# Supplementary material for: Alpinumisoflavone Exhibits the Therapeutic Effect on Prostate Cancer Cells by Repressing AR and Co-Targeting FASN- and HMGCR-Mediated Lipid and Cholesterol Biosynthesis
Source: MDPI journal article supplement (doi:10.3390/life12111769), 2022-11-02
Supplement: s1 [file s1]

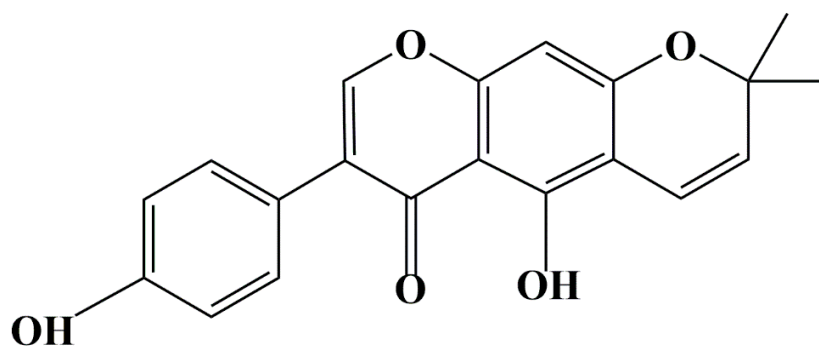

**Supplementary Figure S1.** The chemical structure of AIF.

**Table S1.** The oligonucleotide sequences of the primers used for qPCR analysis

| Gene           | Forward (5'-3')        | Reverse (5'-3')       |
|----------------|------------------------|-----------------------|
| AR             | GCCTTGCTCTCTAGCCTCAA   | GTCGTCCACGTGTAAGTTGC  |
| PSA            | GTGTGTGGACCTCCATGTTATT | CCACTCACCTTTCCCCTCAAG |
| FASN           | ACAGCGGGGAATGGGTACT    | GACTGGTACAACGAGCGGAT  |
| HMGCR          | GTCATTCCAGCCAAGGTTGT   | GGGACCACTTGCTTCCATTA  |
| $\beta$ -actin | AACTGGAACGGTGAAGGTGAC  | TGTGGACTTGGGAGAGGACTG |
